# Supplementary material
Source: PubMed Central journal article supplement (PMC10155060)
Supplement: NIHMS1895692-supplement-1.pdf [file NIHMS1895692-supplement-1.pdf]

**Supplementary Table 1. Characteristics of Varicella Outbreaks and Clusters and Case Characteristics, United States 2016–2019**

|                                              | <b>Clusters or Outbreaks</b><br>(≥3 Cases) | <b>Outbreaks</b><br>(≥5 Cases) | <b>Clusters</b><br>(3–4 Cases) |
|----------------------------------------------|--------------------------------------------|--------------------------------|--------------------------------|
| <b>Outbreak/Cluster Characteristics</b>      |                                            |                                |                                |
| <b>Outbreaks or Clusters (#)</b>             | N=825                                      | N=316                          | N=509                          |
| <b>Duration, in days (median, IQR)</b>       | 16 (9–29)                                  | 30 (17–45)                     | 14 (4–18)                      |
| <b>Size, # cases (median, IQR)</b>           | 4 (3–6)                                    | 7 (5–10)                       | 3 (3–4)                        |
| Total # cases                                | 5,153                                      | 3,465                          | 1,688                          |
| <10 cases                                    | 742 (90%)                                  | 233 (73%)                      | NA                             |
| <b>Outbreak Setting (#, %)</b>               |                                            |                                |                                |
| Daycare                                      | 126 (15%)                                  | 59 (19%)                       | 67 (13%)                       |
| School                                       | 234 (28%)                                  | 130 (41%)                      | 104 (20%)                      |
| Elementary (% among school outbreaks)        | 122 (52%)                                  | 63 (49%)                       | 59 (57%)                       |
| Middle (% among school outbreaks)            | 9 (4%)                                     | 5 (4%)                         | 4 (4%)                         |
| High (% among school outbreaks)              | 11 (5%)                                    | 5 (4%)                         | 6 (6%)                         |
| Unspecified/mixed (% among school outbreaks) | 92 (39%)                                   | 57 (44%)                       | 35 (34%)                       |
| College                                      | 11 (1%)                                    | 6 (2%)                         | 5 (1%)                         |
| Correctional or Detention                    | 86 (10%)                                   | 44 (14%)                       | 42 (8%)                        |
| Household/Household Contacts <sup>a</sup>    | 285 (35%)                                  | 49 (16%)                       | 236 (46%)                      |
| Other <sup>b</sup>                           | 80 (10%)                                   | 25 (8%)                        | 54 (11%)                       |
| Unknown                                      | 3 (0%)                                     | 2(1%)                          | 1 (0%)                         |
| <b>Laboratory Confirmation</b>               |                                            |                                |                                |
| ≥1 case                                      | 222 (27%)                                  | 122 (39%)                      | 100 (20%)                      |
| Cases laboratory confirmed, # (median, IQR)  | 2 (1–3)                                    | 2 (1–3)                        | 1 (1–2)                        |
| <b>Case Characteristics</b>                  |                                            |                                |                                |
| <b># Cases</b>                               | N=5,153                                    | N=3,465                        | N=1,688                        |
| <b>Age, years (median, range)</b>            | 7 (0–79)                                   | 7 (0–74)                       | 7 (0–79)                       |
| <b>Age Group</b>                             |                                            |                                |                                |

|                                                                 | <b>Clusters or Outbreaks</b><br>(≥3 Cases) | <b>Outbreaks</b><br>(≥5 Cases) | <b>Clusters</b><br>(3–4 Cases) |
|-----------------------------------------------------------------|--------------------------------------------|--------------------------------|--------------------------------|
| <1                                                              | 319 (6%)                                   | 208 (6%)                       | 111 (7%)                       |
| 1–4                                                             | 1,222 (24%)                                | 810 (23%)                      | 412 (24%)                      |
| 5–9                                                             | 1,670 (32%)                                | 1,118 (32%)                    | 552 (33%)                      |
| 10–14                                                           | 755 (15%)                                  | 491 (14%)                      | 264 (16%)                      |
| 15–19                                                           | 209 (4%)                                   | 135 (4%)                       | 74 (4%)                        |
| ≥20                                                             | 764 (15%)                                  | 518 (15%)                      | 246 (15%)                      |
| Unknown                                                         | 214 (4%)                                   | 185 (5%)                       | 29 (2%)                        |
| <b>Vaccination Status (% among those with non-missing data)</b> |                                            |                                |                                |
| Unvaccinated                                                    | 3,272 (70%)                                | 2,281 (73%)                    | 991 (63%)                      |
| Vaccinated                                                      | 1,300 (28%)                                | 767 (25%)                      | 533 (34%)                      |
| 1 dose                                                          | 653 (14%)                                  | 397 (13%)                      | 256 (16%)                      |
| ≥2 doses <sup>c</sup>                                           | 540 (12%)                                  | 278 (9%)                       | 262 (17%)                      |
| Unknown doses                                                   | 107 (2%)                                   | 92 (3%)                        | 15 (1%)                        |
| Disease history <sup>d</sup>                                    | 112 (2%)                                   | 68 (2%)                        | 44 (3%)                        |
| Total with vaccination information                              | 4,684 (91%)                                | 3,116 (90%)                    | 1,568 (93%)                    |
| <b>Number of Lesions</b>                                        |                                            |                                |                                |
| <50                                                             | 1,545 (35%)                                | 961 (32%)                      | 584 (41%)                      |
| ≥50                                                             | 2,091 (47%)                                | 1,390 (47%)                    | 701 (49%)                      |
| Unknown                                                         | 792 (18%)                                  | 636 (21%)                      | 156 (11%)                      |
| <b>Hospitalized</b>                                             |                                            |                                |                                |
| Yes <sup>e,f</sup>                                              | 45 (1%)                                    | 18 (1%)                        | 27 (2%)                        |
| No                                                              | 4,681 (92%)                                | 3,132 (92%)                    | 1,549 (92%)                    |
| Unknown                                                         | 345 (7%)                                   | 244 (7%)                       | 101 (6%)                       |
| <b>Complications</b>                                            |                                            |                                |                                |
| Yes <sup>g</sup>                                                | 29 (1%)                                    | 19 (1%)                        | 10 (1%)                        |
| No                                                              | 5,011 (98%)                                | 3,392 (98%)                    | 1,619 (97%)                    |
| Unknown                                                         | 68 (1%)                                    | 36 (1%)                        | 32 (2%)                        |
| <b>Laboratory confirmation</b>                                  |                                            |                                |                                |
| Yes                                                             | 513 (11%)                                  | 346 (11%)                      | 167 (10%)                      |

|         | <b>Clusters or Outbreaks</b><br>(≥3 Cases) | <b>Outbreaks</b><br>(≥5 Cases) | <b>Clusters</b><br>(3–4 Cases) |
|---------|--------------------------------------------|--------------------------------|--------------------------------|
| No      | 4,231 (87%)                                | 2,738 (87%)                    | 1,493 (89%)                    |
| Pending | 6 (0%)                                     | 6 (0%)                         | 0 (0%)                         |
| Unknown | 96 (2%)                                    | 75 (2%)                        | 21 (1%)                        |

Abbreviation: IQR=interquartile range.

<sup>a</sup>Includes relatives and visitors to the household who do not live in the household; household was the most likely transmission setting.

<sup>b</sup>Other settings included community, healthcare (hospice, drug/mental health rehabilitation facility), church, work, farm, group shelter, long-term care facility, ship, air travel, country club, and multiple settings.

<sup>c</sup>Of 540 cluster or outbreak-associated patients who received ≥2 doses, 8 (1.5%) received 3–4 doses.

<sup>d</sup>Among 112 with disease history, 23 were also vaccinated (10 with 1 dose, 11 with 2 doses, and 2 with unknown number of doses).

<sup>e</sup>Vaccination status of the 45 hospitalized patients: 28 (62%) unvaccinated; 8 (18%) vaccinated (4 1-dose, 4 2-doses), 3 (7%) disease history; 6 (13%) unknown vaccination status.

<sup>f</sup>None of the vaccinated hospitalized patients had a specified complication; 3 were hospitalized for observation. Of the hospitalized unvaccinated patients, a complication was listed only for 4 and included eye infection or involvement, groin abscess, strep throat, and febrile seizure.

<sup>g</sup>Vaccination status of the 29 patients who had a reported complication but were not hospitalized: 21 (72%) unvaccinated; 7 (24%) vaccinated, and 1 (4%) unknown vaccination status. Complications for the 21 unvaccinated patients included ataxia, cellulitis, dehydration, disseminated infection, eye infection or involvement, skin infection, GAS pharyngitis, groin abscess, strep infection, otitis media, pneumonia, and skin or soft tissue infection. Of the 7 vaccinated patients reported with a complication, 5 had the complication specified: GAS pharyngitis (n=2), secondary bacterial infection, dehydration, and otitis media.

## Varicella outbreak supplement

**Supplementary Figure 1. Number of varicella outbreaks and clusters reported by year, 2016–2019<sup>a</sup>**

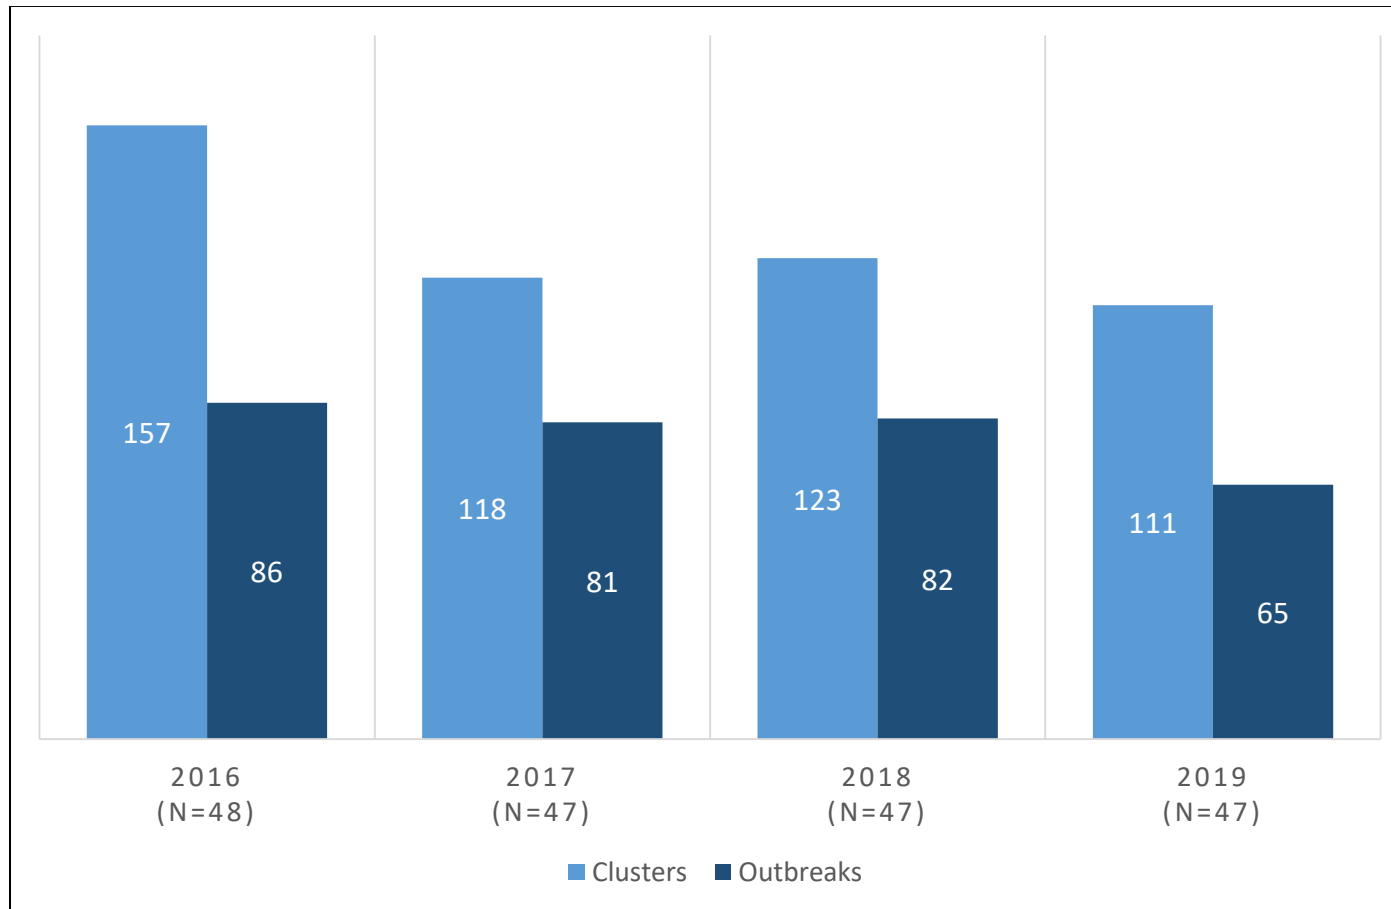

<sup>a</sup>During 2016–2019, 49 (88%) of 56 jurisdictions elected to report varicella data to CDC (including zero-reporting); 48 (98%, 44 states and 4 local jurisdictions) reported  $\geq 1$  outbreak
